# Supplementary material for: Independent and Inflammation-Linked Contribution of Fasting Plasma Glucose to Heart Failure Risk in Chronic Non-Rheumatic Aortic Regurgitation
Source: Research Square preprint supplement (doi:10.21203/rs.3.rs-8300166/v1), 2026-01-12
Supplement: Supplementary file 1 [file 5301931da606f659fc12ee5e.docx]

**Table. S1 ICD-10 Codes Used to Define Baseline Diseases and Outcomes**

| **Diseases and Outcomes** | **ICD-10 Codes** |
| --- | --- |
| **Non-rheumatic aortic regurgitation** | **I35.1** |
| **Rheumatic mitral valve diseases** | **I05.0, I05.1, I05.2, I05.8, I05.9** |
| **Rheumatic aortic valve diseases** | **I06.0, I06.1, I06.2, I06.8, I06.9** |
| **Rheumatic tricuspid valve disease** | **I07.0, I07.1, I07.2, I07.8, I07.9** |
| **Rheumatic combined valve disease** | **I08.0, I08.1, I08.2, I08.3, I08.8, I08.9** |
| **Other rheumatic heart diseases** | **I09.0, I09.1, I09.2, I09.8, I09.9** |
| **Congenital aortic valve insufficiency** | **Q23.1** |
| **Aortic dissection** | **I71.0** |
| **Infective endocarditis** | **I33.0** |
| **Acute myocardial infarction** | **I21.0** |
| **Type I Diabetes** | **E10.0, E10.1, E10.2, E10.3, E10.4, E10.5, E10.6, E10.7, E10.8, E10.9** |
| **Type II Diabetes** | **E11.0, E11.1, E11.2, E11.3, E11.4, E11.5, E11.6, E11.7, E11.8, E11.9** |
| **Complications of diabetes** | **E13.0, E13.1, E13.2, E13.3, E13.4, E13.5, E13.6, E13.7, E13.8, E13.9, E14.0, E14.1, E14.2, E14.3, E14.4, E14.5, E14.6, E14.7, E14.8, E14.9** |
| **Coronary** **atherosclerotic heart disease** | **I20.0, I20.1, I20.8, I20.9, I21.0, I21.1, I21.2, I21.3, I21.4, I21.9, I22.0, I22.1, I22.8, I22.9, I24.0, I24.1, I24.8, I24.9, I25.0, I25.1, I25.2, I25.3, I25.4, I25.5, I25.6, I25.8, I25.9** |
| **Heart Failure** | **I50.0** |
| **Respiratory infectious diseases** | **J12.0, J12.1, J12.2, J12.8, J12.9, J13.0, J14.0, J15.0, J15.1, J15.2, J15.3, J15.4, J15.5, J15.6,**  **J15.7, J15.8, J15.9, J16.0, J16.8, J18.0, J18.1, J18.2, J18.8, J18.9, J20.0, J20.1, J20.2, J20.3, J20.4, J20.5, J20.6, J20.7, J20.8, J20.9, J21.0, J21.8, J21.9, J98.4, U07.1, J00.0, J01.0, J01.1, J01.2, J01.3, J01.4, J01.8, J01.9, J02.0, J02.8, J02.9, J03.0, J03.8, J03.9, J04.0, J04.1, J04.2, J05.0, J05.1, J06.0, J06.8, J06.9, J41.0,**  **J41.1, J41.8, J42.0** |
| **Urinary system infectious diseases** | **N10.0, N11.0, N11.1, N11.8, N11.9, N12.0, N13.0, N13.1, N13.2, N13.3, N13.4, N13.5, N13.6, N13.7, N13.8, N13.9, N14.0, N14.1, N14.2, N14.3, N14.4, N15.0, N15.1, N15.8, N15.9, N30.0, N30.1, N30.2, N30.3, N30.4, N30.8, N30.9, N34.0, N34.1, N34.2, N34.3, N39.0** |
| **Digestive system infectious diseases** | **K12.0, K12.1, K12.2, K20.0, A04.0, A04.1, A04.2, A04.3, A04.4, A04.5, A04.6, A04.7, A04.8, A04.9. A07.0, A07.1, A07.2, A07.3, A07.8, A07.9, A08.0, A08.1, A08.2, A08.3, A08.4, A08.5, A09.0, A09.9, K35.0, K35.1, K35.9, K65.0, K65.8, K65.9, K75.0, K75.1, K75.2, K75.3 , K75.4, K75.8, K75.9, K81.0, K81.1, K81.8, K81.9, K83.0, K57.3, K63.8** |
| **Neurological infectious diseases** | **G00.0, G00.1, G00.2, G00.3, G00.8, G00.9, G03.0, G03.1, G03.2, G03.8, G03.9, G04.0, G04.1, G04.2, G04.8, G04.9, G06.0, G06.1, G06.2, G08.0, B94.1, A85.0, A85.1, A85.2, A85.8** |
| **Hematological diseases** | **D50.0, D50.1, D50.8, D50.9, D51.0, D51.1, D51.2, D51.3, D51.8, D51.9, D52.0, D52.1, D52.8, D52.9, D53.0, D53.1, D53.2, D53.8, D53.9, D55.0, D55.1, D55.2, D55.3, D55.8, D55.9, D56.0, D56.1, D56.2, D56.3, D56.4, D56.8, D56.9, D57.0, D57.1, D57.2, D57.3, D57.8, D58.0, D58.1, D58.2, D58.8, D58.9, D59.0, D59.1, D59.2, D59.3, D59.4, D59.5, D59.6, D59.8, D59.9, D60.0, D60.1, D60.8, D60.9, D61.0, D61.1, D61.2, D61.3, D61.8, D61.9, D62.0, D64.0, D64.1, D64.2, D64.3, D64.4, D64.8, D64.9, D65.0, D66.0, D67.0, D68.0, D68.1, D68.2, D68.3, D68.4, D68.5, D68.6, D68.8, D68.9, D69.0, D69.1, D69.2, D69.3, D69.4, D69.5, D69.6, D69.8, D69.9, D70.0, D71.0, D72.0, D72.1, D72.8, D72.9, D73.0, D73.1, D73.2, D73.3, D73.4, D73.5, D73.8, D74.0, D74.8, D74.9, D75.0, D75.1, D75.2, D75.8, D75.9, D76.0, D76.1, D76.2, D76.3, D45.0, D46.0, D46.1, D46.2, D46.3, D46.4, D46.7, D46.9, D47.0, D47.1, D47.2, D47.3, D47.7, D47.9, C81.0, C81.2, C81.3, C81.7, C81.9, C82.0, C82.1, C82.2, C82.7, C82.9, C83.0, C83.1, C83.2, C83.3, C83.4, C83.5, C83.6, C83.7, C83.8, C83.9, C84.0, C84.1, C84.2, C84.3, C84.4, C84.5, C85.0, C85.1, C85.7, C85.9, C90.0, C91.0, C91.1, C91.2, C91.3, C91.4, C91.5, C91.7, C91.9, C92.0, C92.1, C92.3, C92.4, C92.5, C92.7, C92.9, C93.0, C93.1, C93.2, C93.7, C93.9, C94.0, C94.1, C94.2, C94.2, C94.3, C94.4, C94.5, C94.7, C95.0, C95.1, C95.2, C95.7, C95.9** |

**Table. S2 The Numbers (Percentages) of Participants with Missing Covariates**

| **Covariates** | **n** | **%** |
| --- | --- | --- |
| **Age** | 5 | 0.04 |
| **SBP (left side)** | 25 | 0.18 |
| **DBP (left side)** | 29 | 0.21 |
| **SBP (right side)** | 78 | 0.58 |
| **DBP (right side)** | 80 | 0.59 |
| **Height** | 5 | 0.04 |
| **Weight** | 7 | 0.05 |
| **Waist** | 19 | 0.14 |
| **BMI** | 38 | 0.28 |
| **WBC** | 49 | 0.36 |
| **SCr** | 122 | 0.90 |
| **TC** | 459 | 3.39 |
| **TG** | 460 | 3.39 |
| **Education** | 204 | 1.51 |
| **Occupation** | 444 | 3.28 |
| **Marriage** | 22 | 0.16 |
| **Exercise** | 671 | 4.95 |
| **Smoking** | 725 | 5.35 |
| **Drinking** | 741 | 5.47 |

Abbreviations: SBP = systolic blood pressure; DBP = diastolic blood pressure; BMI = body mass

index; WBC = white blood cell; SCr = serum creatinine; TC = total cholesterol; TG = total glyceride.

**Table. S3** **Baseline Characteristics of the Study Participants with Chronic**

**Nonrheumatic Aortic Regurgitation in UK Biobank**

| **Characteristics** | **Overall**  **(n = 418)** | **FPG < 6.1**  **(n = 372)** | **FPG ≥ 6.1**  **(n = 46)** | **P Value** | |
| --- | --- | --- | --- | --- | --- |
| **Age, years** | 62 (56, 66) | 62 (56, 66) | 63 (57, 66) | | 0.848 |
| < 65, n (%) | 281 (67.2) | 249 (66.9) | 32 (69.6) | |  |
| ≥ 65, n (%) | 137 (32.8） | 123 (33.1) | 14 (30.4) | |  |
| **Gender, n (%)** |  |  |  | | 0.913 |
| Female | 153 (36.6) | 137 (36.8) | 16 (34.8) | |  |
| Male | 265 (63.4) | 235 (63.2) | 30 (65.2) | |  |
| **Smoking, n (%)** |  |  |  | | 0.252 |
| No | 183 (43.8) | 167 (44.9) | 16 (34.8) | |  |
| Yes | 235 (56.2) | 205 (55.1) | 30 (65.2) | |  |
| **Alcohol consumption,**  **n (%)** |  |  |  | | 0.177 |
| No | 23 (5.5) | 18 (4.8) | 5 (10.9) | |  |
| Yes | 395 (94.5) | 354 (95.2) | 41 (89.1) | |  |
| **Hypertension, n (%)** |  |  |  | | 0.039 |
| No | 210 (50.2) | 194 (52.2) | 16 (34.8) | |  |
| Yes | 208 (49.8) | 178 (47.8) | 30 (65.2) | |  |
| **Diabetes, n (%)** |  |  |  | | < 0.001 |
| No | 353 (84.5) | 335 (90.1) | 18 (39.1) | |  |
| Yes | 65 (15.5) | 37 (9.9) | 28 (60.9) | |  |
| **CAD, n (%)** |  |  |  | | 0.016 |
| No | 326 (78.0) | 297 (79.8) | 29 (63.0) | |  |
| Yes | 92 (22.0) | 75 (20.2) | 17 (37.0) | |  |
| **Hyperlipidemia, n (%)** |  |  |  | | 0.062 |
| No | 240 (57.4) | 220 (59.1) | 20 (43.5) | |  |
| Yes | 178 (42.6) | 152 (40.9) | 26 (56.5) | |  |
| **FPG, mmol/L** | 4.97 (4.64, 5.41) | 4.90 (4.59, 5.25) | 6.97 (6.39, 9.44) | | < 0.001 |

Continuous variables that follow a normal distribution are represented by mean ± SD, while variables that do not follow a normal distribution are represented by interquartile range.

Categorical variable data are expressed as n (%).

Abbreviations: CAD = coronary atherosclerotic heart disease; FPG = fasting Plasma Glucose

**Table. S4 Cox Model of Fasting Plasma Glucose and Heart Failure Risk in CNRAR in UK Biobank**

| **Models** | **FPG < 6.1** | **FPG ≥ 6.1** | | **P for trend** | **Continuous** | |
| --- | --- | --- | --- | --- | --- | --- |
|  |  | **HR [95% CI]** | **P Value** |  | **HR [95% CI]** | **P Value** |
|  |  |  |  |  |  |  |
| **Cases/ Participants** | 91/372 | 22/46 |  |  | 113/418 |  |
| **Model 1** | Ref. | 2.439 [1.529-3.891] | < 0.001 | < 0.001 | 1.204 [1.115-1.302] | < 0.001 |
| **Model 2** | Ref. | 1.880 [1.158-3.050] | 0.011 | 0.011 | 1.135 [1.046-1.231] | 0.002 |
| **Model 3** | Ref. | 1.713 [1.044-2.808] | 0.033 | 0.033 | 1.118 [1.017-1.202] | 0.010 |

Model 1: Adjusted for age and gender

Model 2: Adjusted for age, gender, hypertension, coronary atherosclerotic heart disease, hyperlipidemia

Model 3: Adjusted for age, gender, hypertension, coronary atherosclerotic heart disease, hyperlipidemia, smoking, alcohol consumption.

Abbreviations: CNRAR = chronic non-rheumatic aortic regurgitation; HR, hazard ratio; CI, confidence interval.

**Table. S5 Baseline** **Characteristics of the Study Participants with CNRAR before and after IPTW**

|  |  | **Before IPTW** |  |  |  | **After IPTW** |  |  |
| --- | --- | --- | --- | --- | --- | --- | --- | --- |
| **Clinical Characteristics** | **3.9 ≤ FPG < 6.1** | **6.1 ≤ FPG < 7.0** | **7.0 ≤ FPG < 16.7** | **SMD** | **3.9 ≤ FPG < 6.1** | **6.1 ≤ FPG < 7.0** | **7.0 ≤ FPG < 16.7** | **SMD** |
|  | **n = 9883** | **n = 1580** | **n = 1737** |  | **n = 9133** | **n = 1476** | **n = 1133** |  |
| **Age, years** | 65 (57, 72) | 66 (58, 73) | 65 (59, 72) | 0.094 | 65 (57, 72) | 66 (58, 73) | 66 (59, 73) | 0.091 |
| **Gender, n (%)** |  |  |  | 0.045 |  |  |  | 0.022 |
| Female | 4712 (47.7) | 700 (44.3) | 827 (47.6) |  | 4812 (52.7) | 802 (54.3) | 616 (54.4) |  |
| Male | 5171 (52.3) | 880 (55.7) | 910 (52.4) |  | 4321 (47.3) | 674 (45.7) | 517 (45.6) |  |
| **Education, n (%)** |  |  |  | 0.012 |  |  |  | 0.038 |
| Under secondary | 8105 (82.0) | 1285 (81.3) | 1421 (81.8) |  | 1651 (18.1) | 267 (18.1) | 180 (15.9) |  |
| Secondary and above | 1778 (18.0) | 295 (18.7) | 316 (18.2) |  | 7482 (81.9) | 1209 (81.9) | 953 (84.1) |  |
| **Occupation, n (%)** |  |  |  | 0.064 |  |  |  | 0.039 |
| Mantal | 1160 (11.7) | 202 (12.8) | 244 (14.0) |  | 4020 (44.0) | 649 (44.0) | 495 (43.7) |  |
| Physical | 6675 (67.5) | 1017 (64.4) | 1107 (63.7) |  | 1514 (16.6) | 250 (16.9) | 182 (16.1) |  |
| Other | 2048 (20.7) | 361 (22.8) | 386 (22.2) |  | 3599 (39.4) | 577 (39.1) | 456 (40.2) |  |
| **Marital Status, n (%)** |  |  |  | 0.072 |  |  |  | 0.064 |
| Married | 8577 (86.8) | 1362 (86.2) | 1497 (86.2) |  | 402 (4.4) | 64 (4.3) | 52 (4.6) |  |
| Unmarried | 143 (1.4) | 21 (1.3) | 13 (0.7) |  | 3004 (32.9) | 487 (33.0) | 375 (33.1) |  |
| Widowed | 1026 (10.4) | 184 (11.6) | 208 (12.0) |  | 2722 (29.8) | 437 (29.6) | 332 (29.3) |  |
| Divorced | 137 (1.4) | 13 (0.8) | 19 (1.1) |  | 3005 (32.9) | 488 (33.1) | 374 (33.0) |  |
| **Physical Activity, n (%)** |  |  |  | 0.078 |  |  |  | 0.017 |
| No | 8492 (85.9) | 1290 (81.6) | 1421 (81.8) |  | 1346 (14.7) | 229 (15.5) | 177 (15.6) |  |
| Yes | 1391 (14.1) | 290 (18.4) | 316 (18.2) |  | 7787 (85.3) | 1247 (84.5) | 956 (84.4) |  |
| **Smoking, n (%)** |  |  |  | 0.033 |  |  |  | 0.006 |
| No | 9320 (94.3) | 1471 (93.1) | 1624 (93.5) |  | 526 (5.8) | 88 (6.0) | 67 (5.9) |  |
| Yes | 563 (5.7) | 109 (6.9) | 113 (6.5) |  | 8607 (94.2) | 1388 (94.0) | 1066 (94.1) |  |
| **Drinking, n (%)** |  |  |  | 0.048 |  |  |  | 0.006 |
| No | 9575 (96.9) | 1509 (95.5) | 1670 (96.1) |  | 295 (3.2) | 46 (3.1) | 35 (3.1) |  |
| Yes | 308 (3.1) | 71 (4.5) | 67 (3.9) |  | 8838 (96.8) | 1430 (96.9) | 1098 (96.9) |  |
| **Hypertension, n (%)** |  |  |  | 0.122 |  |  |  | 0.049 |
| No | 6942 (70.2) | 1042 (65.9) | 1070 (61.6) |  | 2819 (30.9) | 483 (32.7) | 389 (34.3) |  |
| Yes | 2941 (29.8) | 538 (34.1) | 667 (38.4) |  | 6314 (69.1) | 993 (67.3) | 744 (65.7) |  |
| **Diabetes, n (%)** |  |  |  | 0.792 |  |  |  | 0.137 |
| No | 9098 (92.1) | 1328 (84.1) | 762 (43.9) |  | 1291 (14.1) | 225 (15.2) | 250 (22.1) |  |
| Yes | 785 (7.9) | 252 (15.9) | 975 (56.1) |  | 7842 (85.9) | 1251 (84.1) | 883 (77.9) |  |
| **CAD, n (%)** |  |  |  | 0.027 |  |  |  | 0.016 |
| No | 9407 (95.2) | 1491 (94.4) | 1655 (95.3) |  | 449 (4.9) | 71 (4.8) | 50 (4.4) |  |
| Yes | 476 (4.8) | 89 (5.6%) | 82 (4.7) |  | 8684 (95.1) | 1405 (95.1) | 1083 (95.6) |  |
| **Hyperlipidemia, n (%)** |  |  |  | 0.249 |  |  |  | 0.145 |
| No | 6308 (63.8) | 825 (52.2) | 790 (45.5) |  | 3602 (39.4) | 614 (41.6) | 569 (50.2) |  |
| Yes | 3575 (36.2) | 755 (47.8) | 947 (54.5) |  | 5531 (60.6) | 862 (58.4) | 564 (49.8) |  |
| **Waist Circumference, cm** | 87 (79, 96) | 89 (81, 98) | 92 (82, 100) | 0.214 | 80 (72, 88) | 80 (73, 88) | 81 (73, 90) | 0.099 |
| **BMI, kg/m2** | 25.3 (22.9, 28.3) | 25.6 (23.2, 28.5) | 26.6 (24.0, 29.6) | 0.229 | 25.3 (22.9, 28.3) | 25.4 (23.0, 28.3) | 25.9 (23.6, 28.8) | 0.098 |

Continuous variables that follow a normal distribution are represented by mean ± SD, while variables that do not follow a normal distribution are represented by interquartile range. Categorical variable data are expressed as n (%).

Abbreviations: CAD = coronary atherosclerotic heart disease; BMI = body mass index; SMD = standardized mean difference; CNRAR = chronic non-rheumatic aortic regurgitation; IPTW = Inverse probability of treatment weightin

**Table. S6 Competing Risk Model of Fasting Plasma Glucose and Heart Failure in CNRAR patients**

| **Models** | **3.9 ≤ FPG < 6.1** | **6.1 ≤ FPG < 7.0** | | **7.0 ≤ FPG <16.7** | | **P for trend** | **Continuous** | |
| --- | --- | --- | --- | --- | --- | --- | --- | --- |
|  |  | **SHR [95% CI]** | **P Value** | **SHR [95% CI]** | **P Value** |  | **SHR [95% CI]** | **P Value** |
|  |  |  |  |  |  |  |  |  |
| **Cases/ Participants** | 1410/9883 | 266/1580 |  | 343/1737 |  |  | 2019/13200 |  |
| **Competitive Risk Analysis** | Ref. | 1.175 [1.030-1.340] | 0.017 | 1.334 [1.183-1.504] | < 0.001 | < 0.001 | 1.052 [1.029-1.075] | < 0.001 |

Competitive Risk Analysis:Participants were adjusted for age, gender, education, occupation, marriage, physical activity, smoking, alcohol consumption, hypertension, coronary atherosclerotic heart disease, hyperlipidemia, waist and BMI.

Abbreviations: CNRAR = chronic non-rheumatic aortic regurgitation, SHR = subdistribution hazard ratio; CI, confidence interval.

**Table. S7 Baseline Characteristics of the Participants with and without CNRAR**

**before and after Propensity Matching**

|  | **Before Propensity Matching** | | | | **After Propensity Matching** | | | |
| --- | --- | --- | --- | --- | --- | --- | --- | --- |
| **Clinical Characteristics** | **Non-CNRAR**  **(n = 2774530)** | **CNRAR**  **(n=13200)** | **P Value** | **SMD** | **Non-CNRAR**  **(n = 13199)** | **CNRAR**  **(n=13199)** | **P Value** | **SMD** |
| **Age, years** | 48 (33, 60) | 65 (57, 72) | < 0.001 | 1.163 | 65 (57, 72) | 65 (57, 72) | 0.367 | 0.011 |
| **Gender (Male), n (%)** | 1083102 (39.0) | 6961 (52.7) | < 0.001 | 0.278 | 7048 (53.4) | 6960 (52.7) | 0.283 | 0.013 |
| **Education, n (%)**  Secondary and above | 835368 (30.1) | 2389 (18.1) | < 0.001 | 0.284 | 2375 (18.0) | 2389 (18.1) | 0.835 | 0.003 |
| **Occupation, n (%)** |  |  | < 0.001 | 0.142 |  |  | 0.718 | 0.010 |
| Mantal | 434269 (15.7) | 1606 (12.2) |  |  | 1596 (12.1) | 1606 (12.2) |  |  |
| Physical | 1665345 (60.0) | 8799 (66.7) |  |  | 8857 (67.1) | 8798 (66.7) |  |  |
| Other | 674916 (24.3) | 2795 (21.2) |  |  | 2746 (20.8) | 2795 (21.2) |  |  |
| **Marriage, n (%)** |  |  | < 0.001 | 0.482 |  |  | 1.000 | 0.001 |
| Married | 2266841 (81.7) | 11436 (86.6) |  |  | 11438 (86.7) | 11435 (86.6) |  |  |
| Unmarried | 326446 (11.8) | 177 (1.3) |  |  | 176 (1.3) | 177 (1.3) |  |  |
| Widowed | 128511 (4.6) | 1418 (10.7) |  |  | 1416 (10.7) | 1418 (10.7) |  |  |
| Divorced | 52732 (1.9) | 169 (1.3) |  |  | 169 (1.3) | 169 (1.3) |  |  |
| **Exercise (Yes), n (%)** | 395483 (14.3) | 1997 (15.1) | 0.004 | 0.025 | 1985 (15.0) | 1997 (15.1) | 0.850 | 0.003 |
| **Smoking (Yes), n (%)** | 220081 (7.9) | 785 (5.9) | < 0.001 | 0.078 | 783 (5.9) | 785(5.9) | 0.979 | 0.001 |
| **Drinking (Yes), n (%)** | 149596 (5.4) | 446 (3.4) | < 0.001 | 0.098 | 445 (3.4) | 446 (3.4) | 1.000 | < 0.001 |
| **CAD (Yes), n (%)** | 64662 (2.3) | 647 (4.9) | < 0.001 | 0.138 | 647 (4.9) | 647 (4.9) | 1.000 | < 0.001 |
| **Hypertension (Yes), n (%)** | 457870 (16.5) | 4146 (31.4) | < 0.001 | 0.355 | 4207 (31.9) | 4145 (31.4) | 0.419 | 0.010 |
| **Diabetes (Yes), n (%)** | 223786 (8.1) | 2012 (15.2) | < 0.001 | 0.225 | 2029 (15.4) | 2011 (15.2) | 0.771 | 0.004 |
| **Hyperlipidemia (Yes), n (%)** | 1042958 (37.6) | 5277 (40.0) | < 0.001 | 0.049 | 5243 (39.7) | 5276 (40.0) | 0.687 | 0.005 |
| **Waist, cm** | 85 (78, 94) | 88 (80, 97) | < 0.001 | 0.199 | 88 (80, 97) | 88 (80, 97) | 0.370 | 0.011 |
| **BMI, kg/m2** | 24.8 (22.3, 27.9) | 25.3 (22.9, 28.3) | < 0.001 | 0.113 | 25.4 (23.0, 28.3) | 25.3 (22.9, 28.3) | 0.456 | 0.009 |

Continuous variables that follow a normal distribution are represented by mean ± SD, while variables that do not follow a normal distribution are represented by interquartile range. Categorical variable data are expressed as n (%).

Abbreviations: CNRAR = chronic nonrheumatic aortic regurgitation; CAD = coronary atherosclerotic heart disease; BMI = body mass index; SMD = standardized mean difference
